# Supplementary material
Source: Research Square preprint supplement (doi:10.21203/rs.3.rs-9891310/v1)
Supplement: Supplementary file 1 [file 4de3adb9d4ad6767b680cc2a.docx]

1. DHA-PC significantly alleviated lupus nephritis, improving renal function and reducing proteinuria and kidney injury.

2. DHA-PC suppressed renal inflammation by inhibiting the NF-κB–NLRP3 inflammasome pathway.

3. DHA-PC modulated the gut–kidney axis, enriching beneficial bacteria while reducing pro-inflammatory taxa.
