# Supplementary material
Source: Research Square preprint supplement (doi:10.21203/rs.3.rs-9891310/v1)

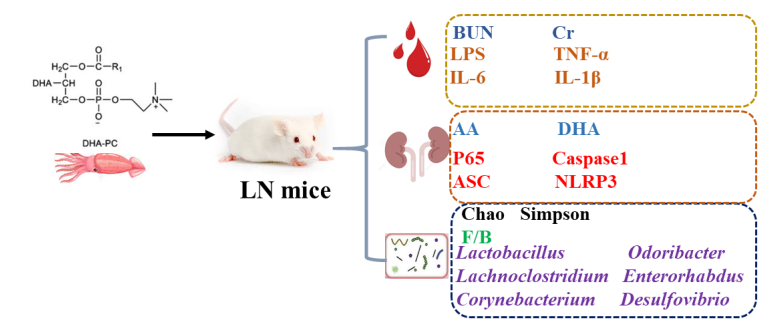

Supplement: Supplementary file 2 [file 78acd64f6733636a0f950825.docx]
